# Supplementary material for: Synthesis of All-Inorganic Halide Perovskite Nanocrystals for Potential Photoelectric Catalysis Applications
Source: MDPI journal article supplement (doi:10.3390/catal13071041), 2023-06-27
Supplement: s1 [file s1]

# Supporting Information

## Synthesis of All-Inorganic Halide Perovskite Nanocrystals for Potential Photoelectric Catalysis Applications

Xiaoqian Wang, Wanli Liu, Jiazhen He, Yuqing Li and Yong Liu \*

International School of Materials Science and Engineering (ISMSE), State Key Laboratory of Advanced Technology for Materials Synthesis and Processing, Wuhan University of Technology, Wuhan 430070, China; 303568@whut.edu.cn (X.W.); liuwani97@163.com (W.L.); jiazhenhe0606@163.com (J.H.); lyqlosyimi@163.com (Y.L.)

\* Correspondence: liuyong3873@whut.edu.cn

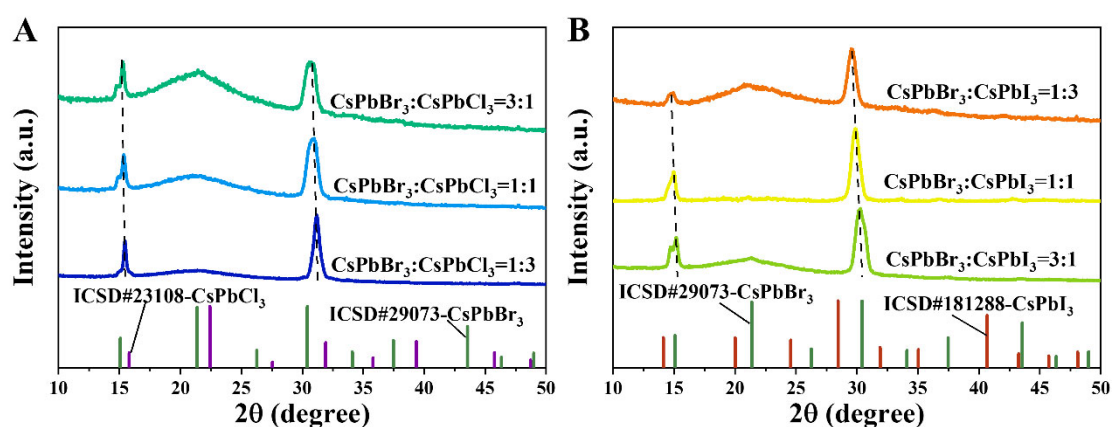

Figure S1. (A,B) XRD patterns of halide perovskite nanocrystals with different halogen composition.

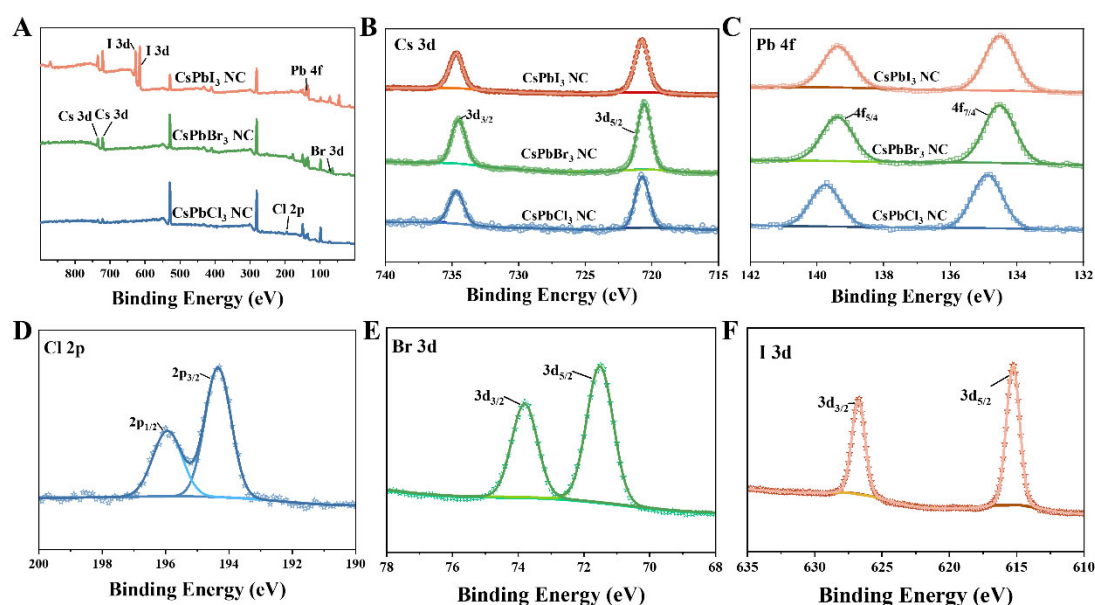

Figure S2. XPS spectra of CsPbX<sub>3</sub> (X = Cl, Br, I) nanocrystals. (A) Full spectra, (B) Cs 3d, (C) Pb 4f, (D) Cl 2p, (E) Br 3d, (F) I 3d.

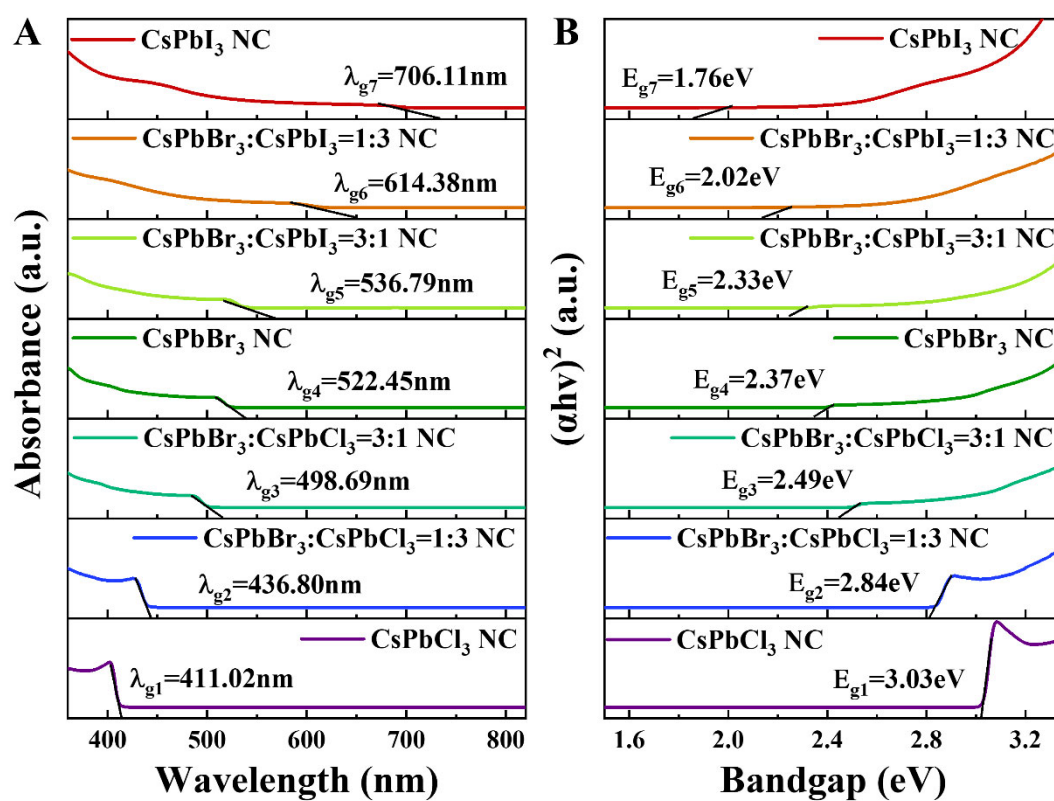

**Figure S3.** (A) UV-vis absorption spectra and (B) Absorbance versus photon energy and the determined bandgap  $E_g$  of halide perovskite nanocrystals with different halogen components.

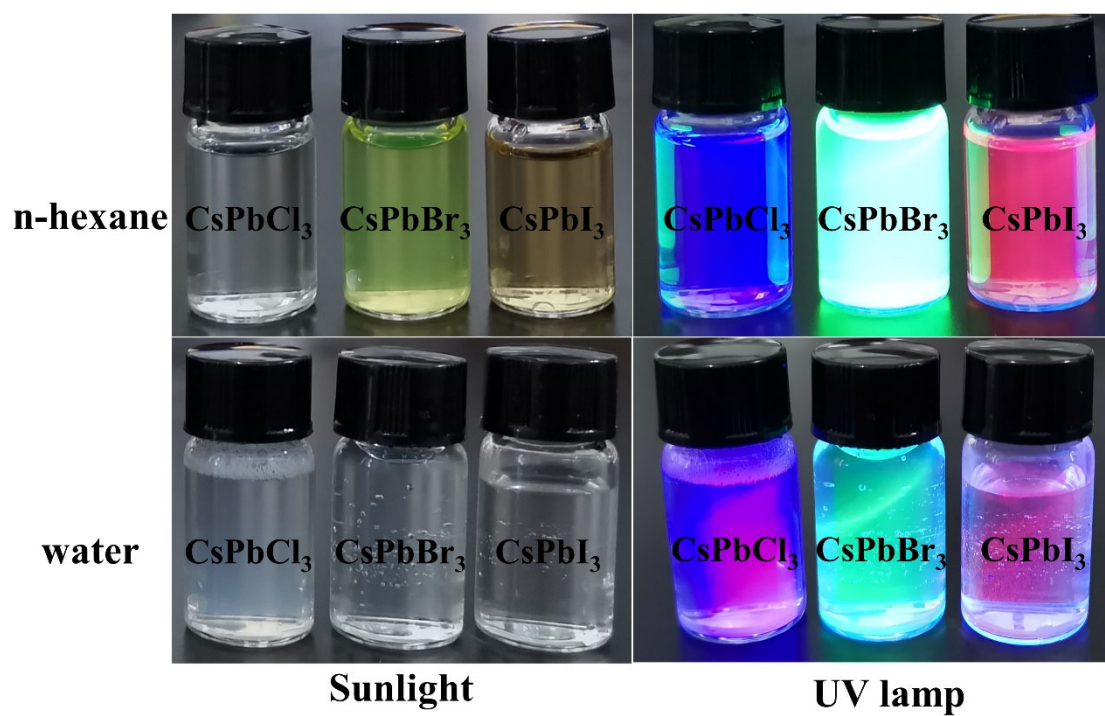

**Figure S4.** Images of  $\text{CsPbX}_3$  (X = Cl, Br, I) nanocrystals in different solvent (water and n-hexane) under sunlight and 365 nm UV lamp, respectively.

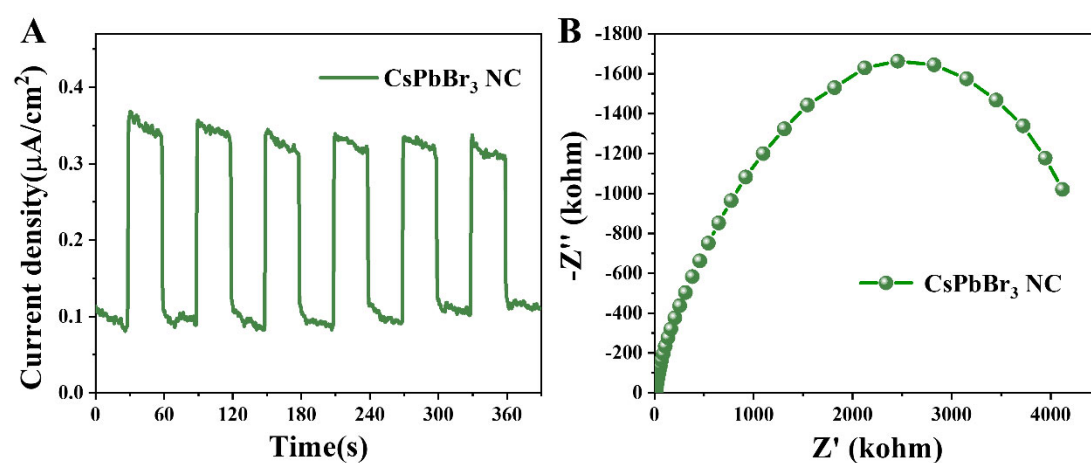

**Figure S5.** (A) Transient photocurrent responses to on-off illumination of CsPbBr<sub>3</sub> nanocrystals electrodes at -0.1 V versus NHE in neutral water (0.5 M Na<sub>2</sub>SO<sub>4</sub>). (B) Electrochemical impedance spectra (Nyquist plot) of CsPbBr<sub>3</sub> nanocrystals.
